# Supplementary material
Source: publisher figshare collection journal article supplement (https://acs.figshare.com/ndownloader/files/3824290)
Supplement: Supplementary file 1 [file 3824290]

## *Supporting Information*

# Chromogenic      Homo-Dinuclear      Ruthenium(II) Monolayer as a Tunable Molecular Memory Module for Multibit Information Storage†

Anup Kumar,<sup>a</sup> Megha Chhatwal,<sup>a</sup> Domenico A. Cristaldi,<sup>b</sup> Satish Kumar Awasthi,<sup>a</sup> Rinkoo D. Gupta<sup>c\*</sup> and Antonino Gulino<sup>b\*</sup>

<sup>a</sup>Chemical Biology Laboratory, Department of Chemistry, University of Delhi, New Delhi-110 007, India

<sup>b</sup>Dipartimento di Scienze Chimiche, Università di Catania, and INSTM Udr of Catania, viale A. Doria 6, 95125 Catania, Italy, Tel: +39 095 7385067, email: [agulino@unict.it](mailto:agulino@unict.it)

<sup>c</sup>Faculty of Life Sciences and Biotechnology, South Asian University, New Delhi-110 021, India, Tel: +91 11 24122512 Ex.225, email: [rdgupta@sau.ac.in](mailto:rdgupta@sau.ac.in)

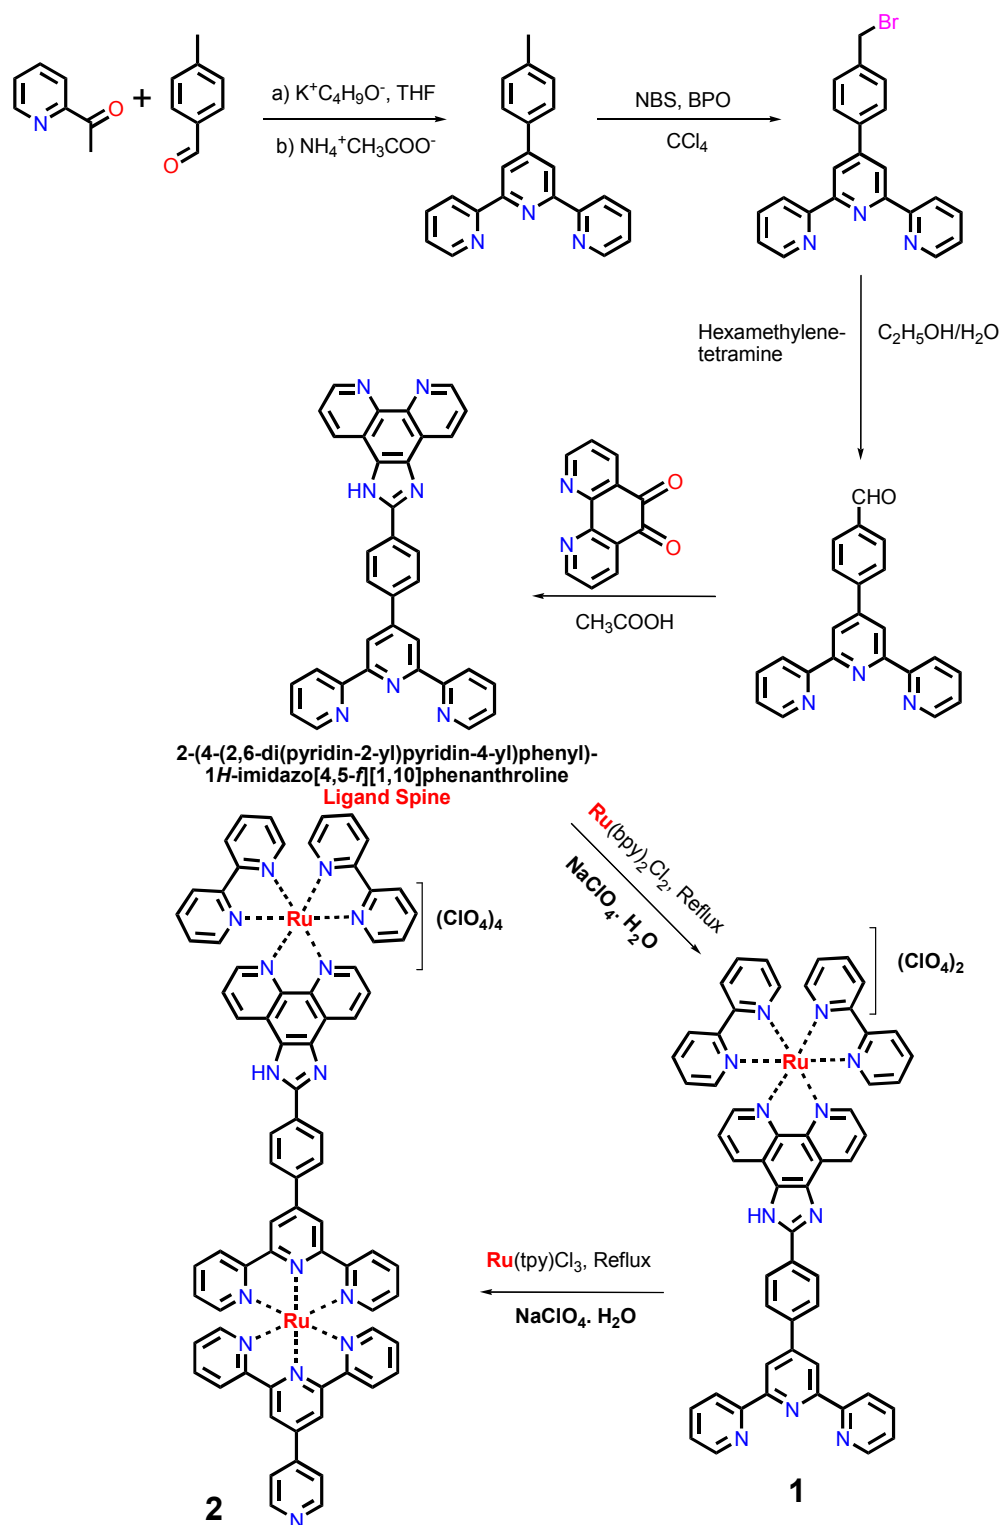

Scheme S1: Synthetic scheme for the homo-bimetallic chromophore **2**.

Characterization of **2**:

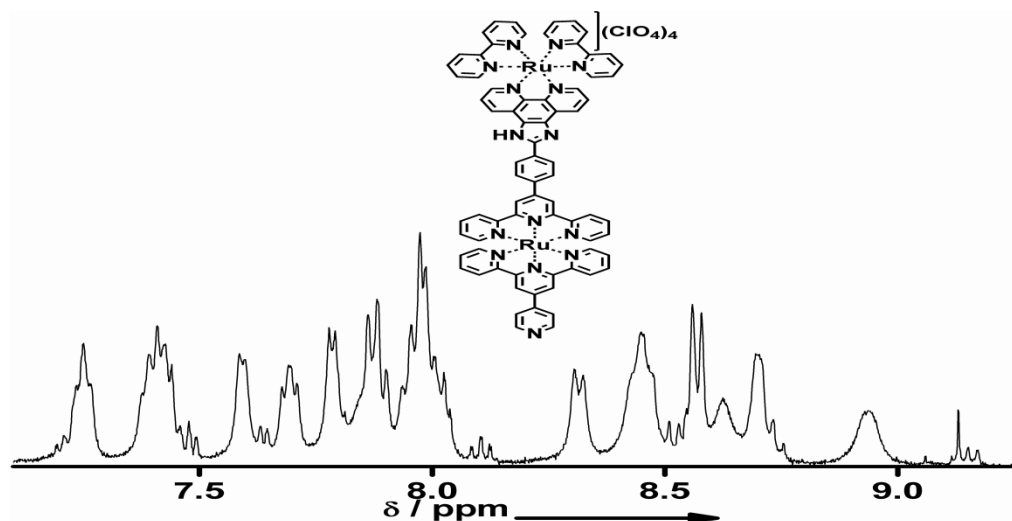

Figure S1:  $^1\text{H}$ -NMR of **2** in  $\text{DMSO}-d_6$  at ambient temperature.

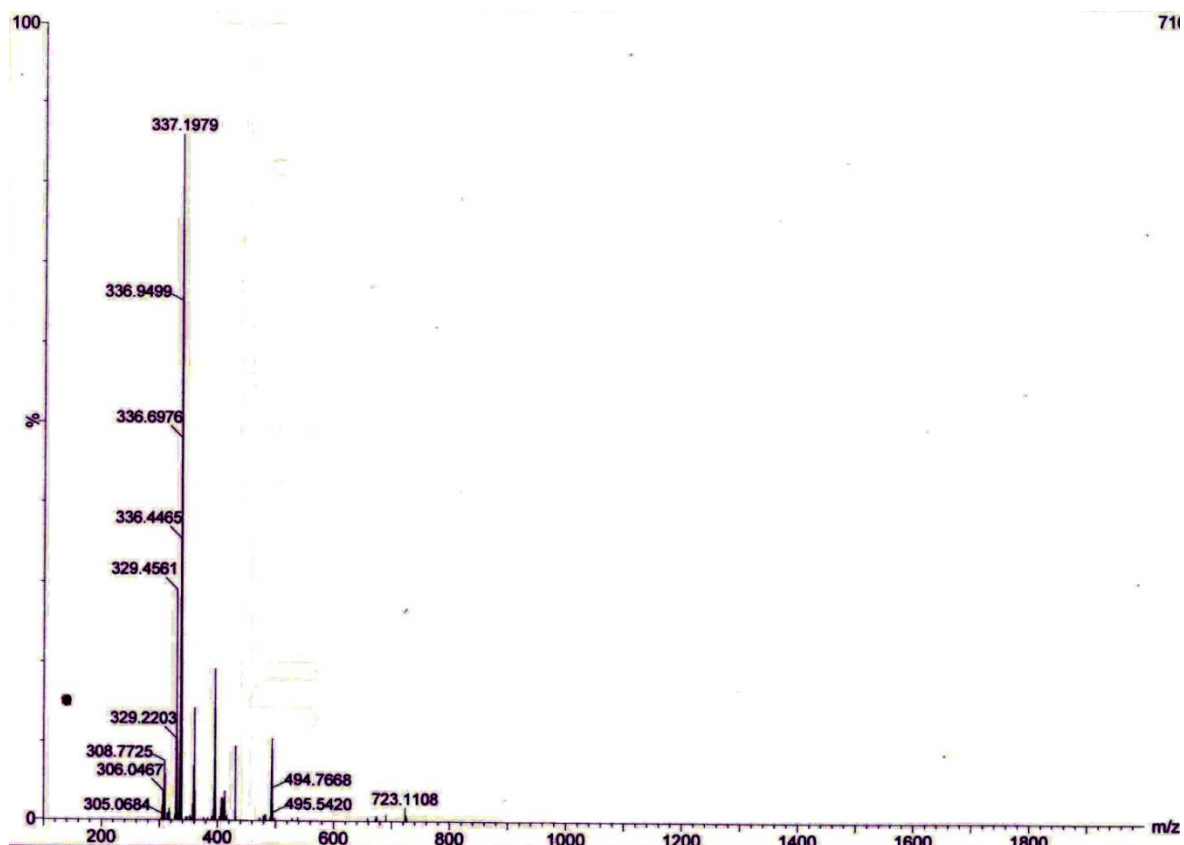

Figure S2: ESI-MS of **2** in acetonitrile at ambient temperature.

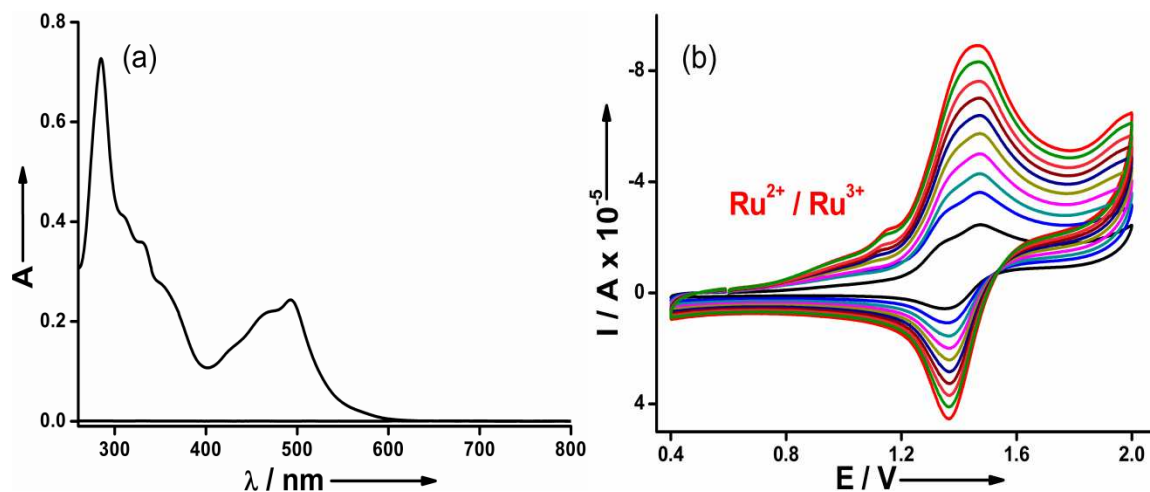

Figure S3: UV-vis spectrum of **2** ( $0.87 \times 10^{-5}$  M, CH<sub>3</sub>CN) at ambient temperature (a), Cyclic voltammetric responses of **2** ( $0.95 \times 10^{-5}$  M,  $10^{-3}$  M TBAP, CH<sub>3</sub>CN) at different scan rates ranging from 100 - 1000 mVs<sup>-1</sup>.

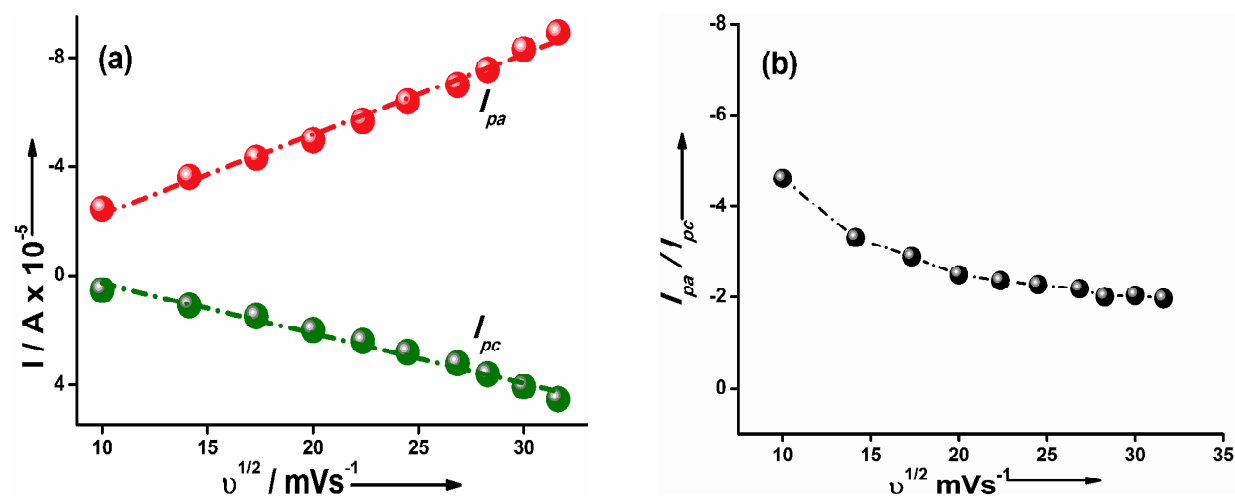

Figure S4: Plot showing linear fit of anodic ( $I_{pa}$ , red balls) and cathodic ( $I_{pc}$ , green balls) peak currents of **2** ( $0.95 \times 10^{-5}$  M,  $10^{-3}$  M TBAP, CH<sub>3</sub>CN) as a function of scan rates ( $R^2 = \sim 0.98$ ) (a), Plot of the peak current ( $I_{pa} / I_{pc}$ ) ratio as a function of scan rates (b).

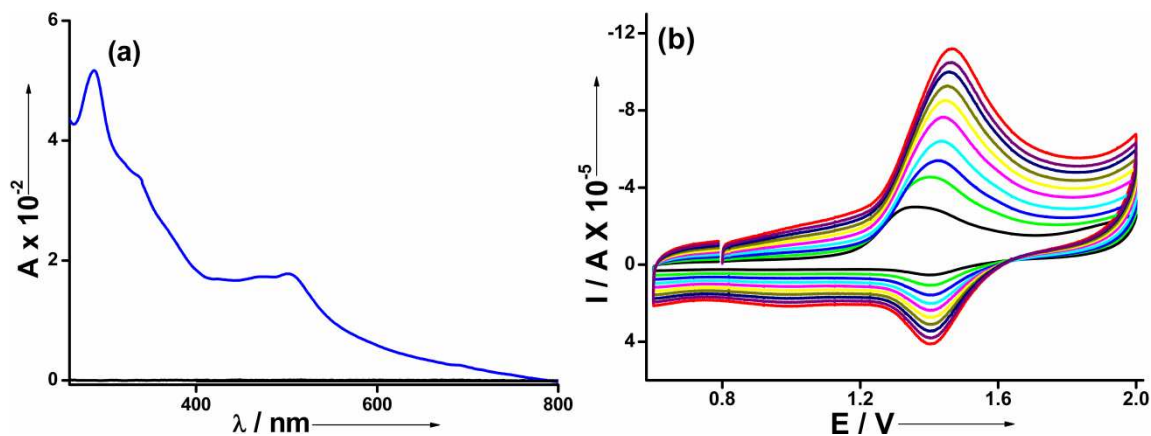

Figure S5: UV-vis spectrum of **2** on ITO monolayer ( $0.8 \times 3$  cm,  $\text{CH}_3\text{CN}$ ) at ambient temperature (a), Cyclic voltammetric responses of **2** on ITO monolayer ( $0.8 \times 3$  cm, 20 mM TBAP,  $\text{CH}_3\text{CN}$ ) at different scan rates ranging from 100-1000  $\text{mVs}^{-1}$  (b).

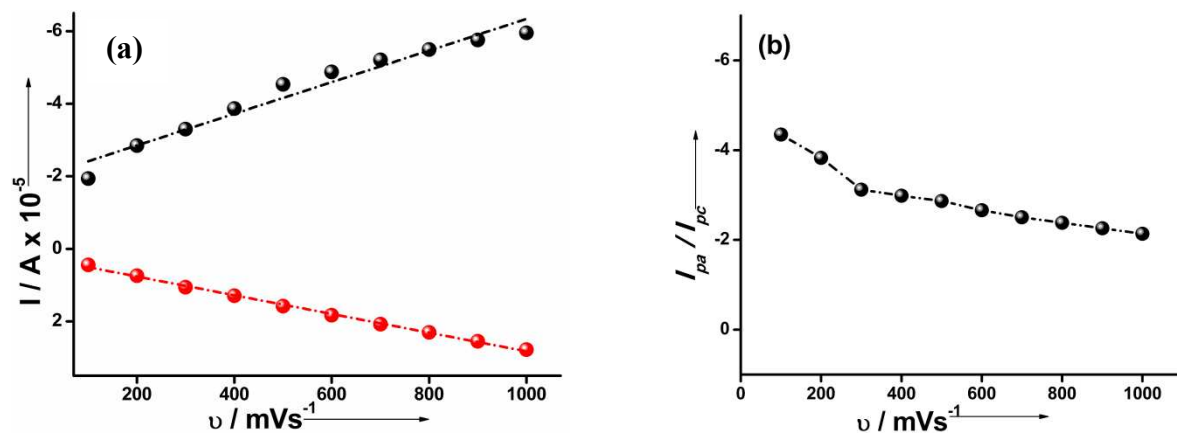

Figure S6: Plot showing the linear fit of anodic ( $I_{pa}$ , black balls) and cathodic ( $I_{pc}$ , red balls) peak currents of **2** on ITO monolayer ( $0.8 \times 3$  cm, 20 mM TBAP,  $\text{CH}_3\text{CN}$ ) ( $R^2 = \sim 0.99$ ) (a), as a function of scan rates (a). Plot of the peak current ( $I_{pa} / I_{pc}$ ) ratio as a function of scan rates (b).

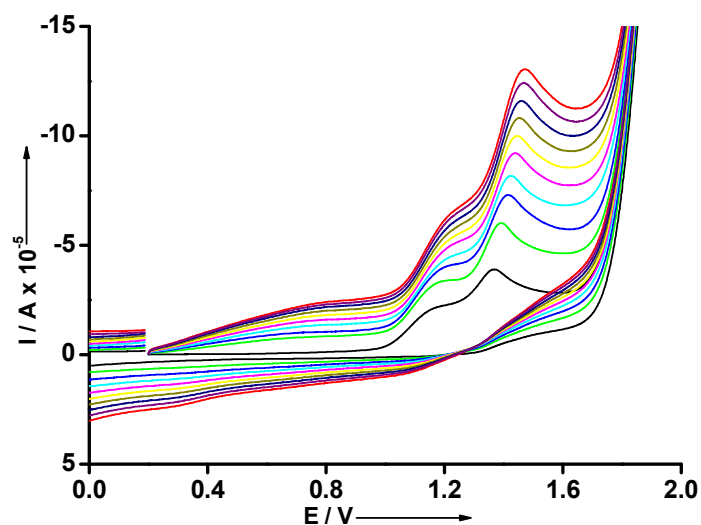

Figure S7: Cyclic voltammetric responses of ligand spine ( $0.87 \times 10^{-5}$  M,  $10^{-3}$  M TBAP,  $\text{CH}_3\text{CN}$ ) at different scan rates ranging from 100-1000  $\text{mVs}^{-1}$ .

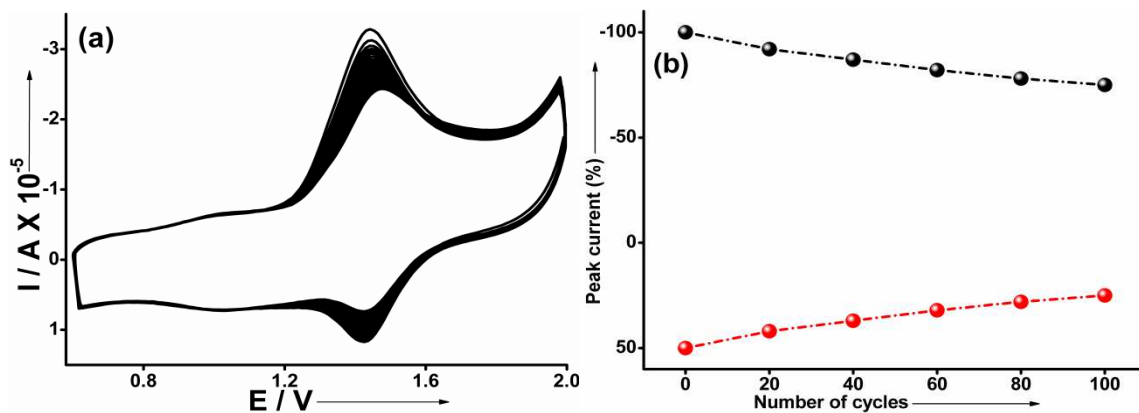

Figure S8: Read-write cycles of **2** on ITO for ruthenium metal centre (a). Anodic peak current (black balls) and cathodic peak current (red balls) as function of scan rate for 100 cycles (b).

**Multi-potential switching of the absorbance of the **2** on ITO:** The **2** on ITO was electro-optically switched by applying various potential biases for 1 s intervals, starting from 0.60 V and to  $0.6 + n \cdot 0.1$  V where  $n = 1, 2, 3 \dots$  so on for 1 s. The monitoring the MLCT band at  $\lambda = 502$  nm

would result in precise control over the transparency of monolayer, as  $\Delta A$  is a function of the voltage until complete (100%) oxidation is achieved.

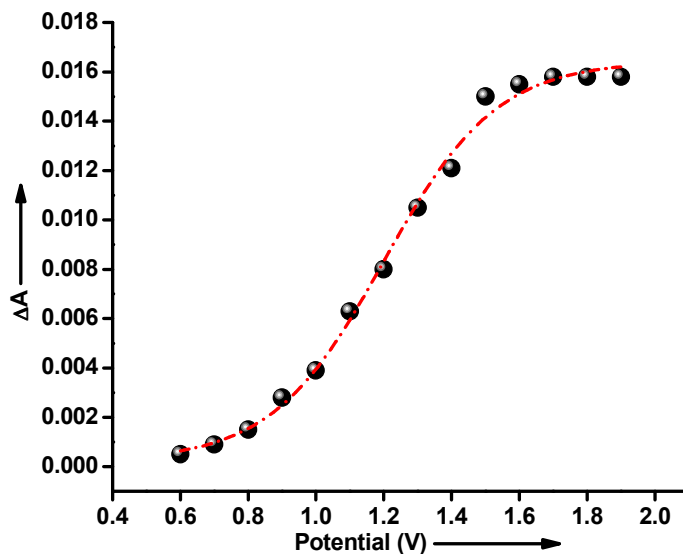

Figure S9. Difference in absorbance ( $\Delta A$ ) of the MLCT band at  $\lambda = 502$  nm of **2** on ITO, as a function of the voltage, upon applying potential biases starting from 0.6 V to  $0.6 + n \cdot 0.1$  V where  $n = 1, 2, 3 \dots$  so on for 1 s. Each data point represents the average of 3 measurements. The dashed red line is a sigmoidal fit ( $R^2 = 0.98$ ) of the data.

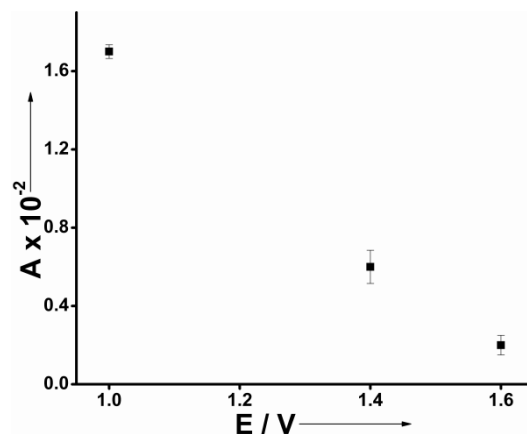

Figure S10: Details of triple-step potential based-switching carried out for three monolayers of **2** on ITO using the same set-up.

**Electrochromic test in solution: Accumulative optical tuning of ruthenium.** The electrolytic solution of homo-binuclear ( $0.97 \times 10^{-5}$  M, 20 mM TBAP, 50 ml) was purged with  $N_2$  in the bulk electrolysis kit for 15 min with mild stirring. Then, potential biases of 1.6 - 1.0 V and 1.0 - 1.4 - 1.6 V were applied for the redox tuning of the ruthenium centers and spectra were recorded as a function of time. The reversibility was tested for 3 successive cycles.

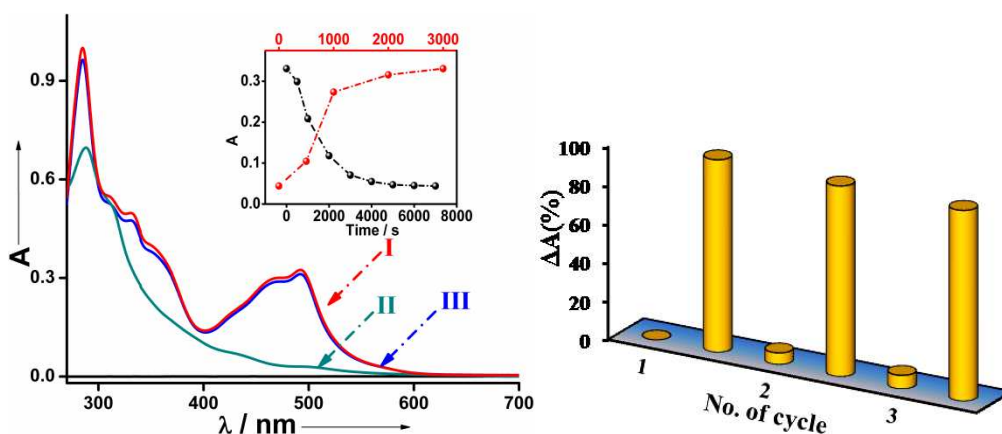

Figure S11: Absorbance intensity changes on electrochemical tuning of the ruthenium centers of the homo-binuclear complex ( $0.97 \times 10^{-5}$  M, 20 mM TBAP in acetonitrile) in its initial spectrum (I) on applying 1.6 V (oxidation potential) (II), on applying 1.0 V (reduction potential) (III). Inset: representative plot for showing the gradual absorbance changes on applying the 1.6 V oxidation potential (black balls) and 1.0 V reduction potential (red balls), and bar chart for showing  $\Delta A$  (%) at 492 nm (MLCT band position in solution study) vs. number of alternative redox cycles.

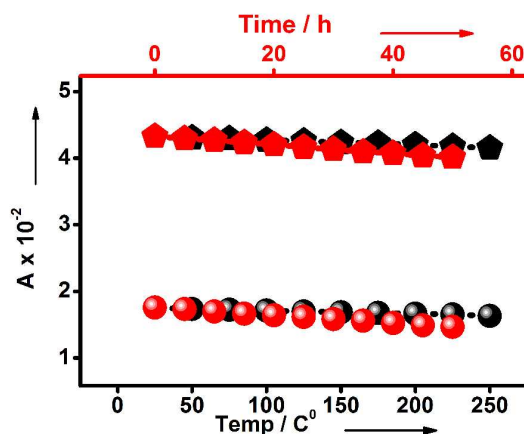



Figure S12: UV-vis monitoring of the **2** on ITO coated glass at various temperatures (25 – 250 °C) and time intervals (1 - 50 h) at 250 °C.

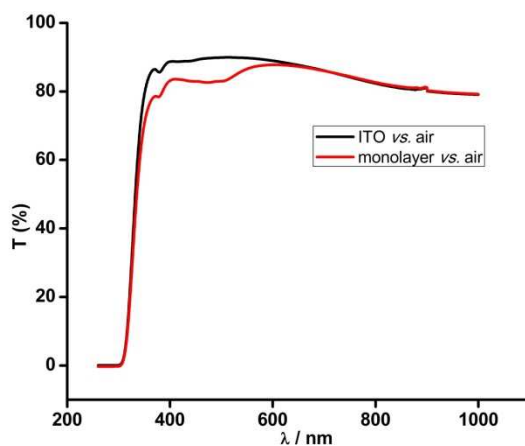

Figure S13: UV-vis transmittance spectra of ITO (black line) and **2** on ITO monolayer ( $0.8 \times 3.0$  cm).
